# Supplementary material for: Facile assembly of a polystyrene microsphere/graphene oxide/porphyrin composite with core–shell structure
Source: Royal Society of Chemistry journal article supplement (doi:10.1039/c4ra06579d), 2014-01-01
Supplement: c4ra06579d1.pdf [file c4ra06579d1.pdf]

## Facile assembly of polystyrene microspheres/graphene oxide/porphyrin composite with core-shell structure

Meijuan Zhang,<sup>a</sup> Xiangqing Li,<sup>\*a</sup> Shi-zhao Kang,<sup>a</sup> Lixia Qin,<sup>a</sup> Guodong Li<sup>b</sup> and Jin Mu<sup>\*a</sup>

<sup>a</sup>School of Chemical and Environmental Engineering, Shanghai Institute of Technology, Shanghai 201418, People's Republic of China.

<sup>b</sup>State Key Laboratory of Inorganic Synthesis and Preparative Chemistry, College of Chemistry, Jilin University, Changchun 130012, People's Republic of China.

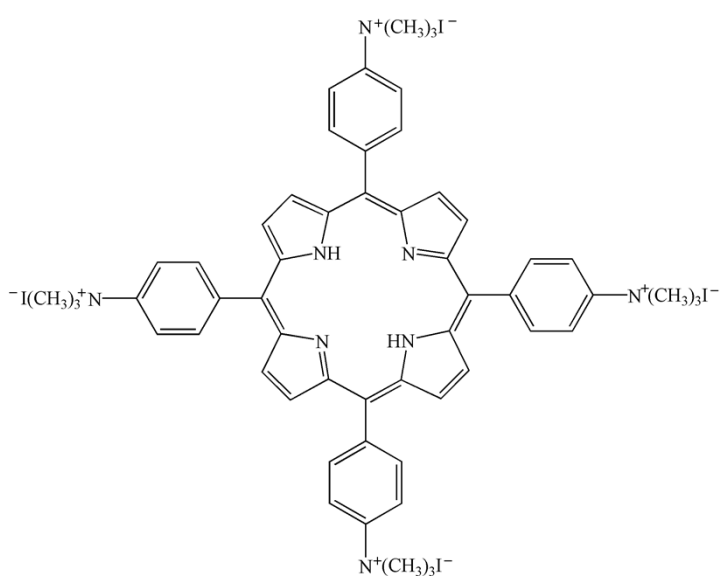

Fig. S1. Structure scheme of the TAPPI.

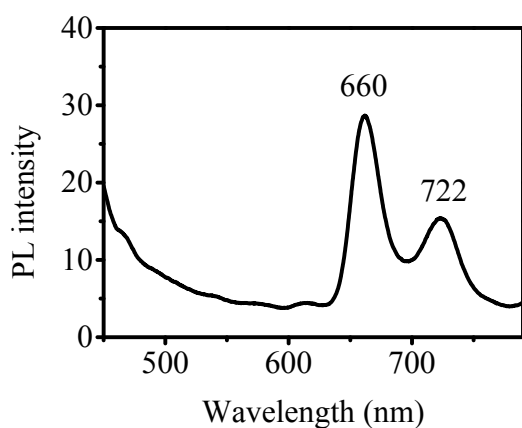

Fig. S2. Fluorescence spectrum of the TAPPI in solid state.  $\lambda_{\text{ex}} = 408$  nm.
